# Supplementary material for: Transcriptomal Insights of Heart Failure from Normality to Recovery
Source: Biomolecules. 2022 May 23;12(5):731. doi: 10.3390/biom12050731 (PMC9138767; doi:10.3390/biom12050731)

Control N1

RIN= 9.3

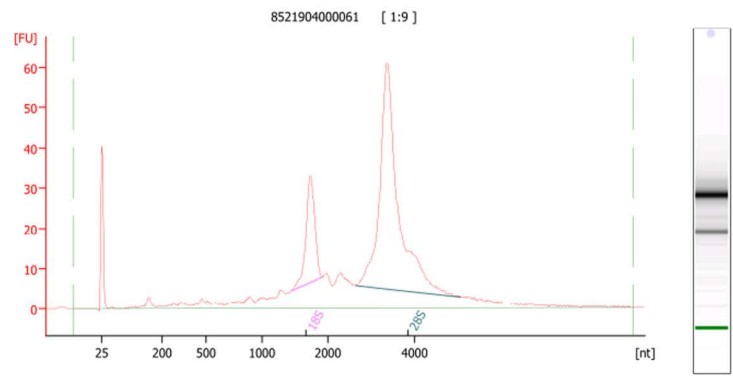

Overall Results for sample 9 : 8521904000061

|                         |             |                             |               |
|-------------------------|-------------|-----------------------------|---------------|
| RNA Area:               | 541.9       | RNA Integrity Number (RIN): | 9.3 (B.02.07) |
| RNA Concentration:      | 1,349 pg/ul | Result Flagging Color:      |               |
| rRNA Ratio [28s / 18s]: | 3.8         | Result Flagging Label:      | RIN: 9.30     |

Fragment table for sample 9 : 8521904000061

| Name | Start Size [nt] | End Size [nt] | Area  | % of total Area |
|------|-----------------|---------------|-------|-----------------|
| 18S  | 1,428           | 1,905         | 58.3  | 10.8            |
| 28S  | 2,649           | 5,072         | 222.4 | 41.0            |

Control N3

RIN= 8.3

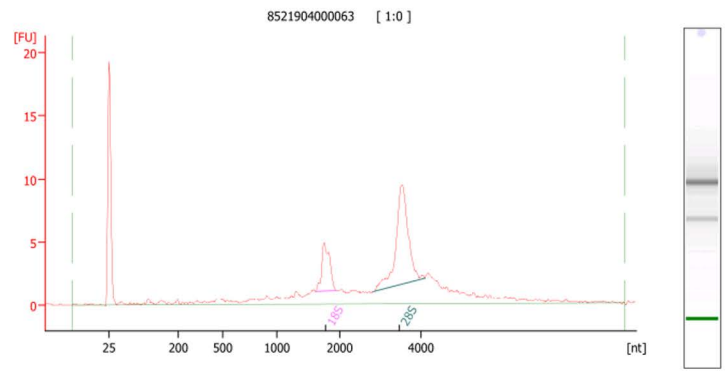

Overall Results for sample 7 : 8521904000063

|                         |          |                             |               |
|-------------------------|----------|-----------------------------|---------------|
| RNA Area:               | 89.5     | RNA Integrity Number (RIN): | 8.3 (B.02.07) |
| RNA Concentration:      | 37 ng/ul | Result Flagging Color:      |               |
| rRNA Ratio [28s / 18s]: | 2.9      | Result Flagging Label:      | RIN: 8.30     |

Fragment table for sample 7 : 8521904000063

| Name | Start Size [nt] | End Size [nt] | Area | % of total Area |
|------|-----------------|---------------|------|-----------------|
| 18S  | 1,622           | 1,962         | 7.2  | 8.1             |
| 28S  | 2,864           | 4,111         | 20.8 | 23.3            |

Control N4

RIN= 8.4

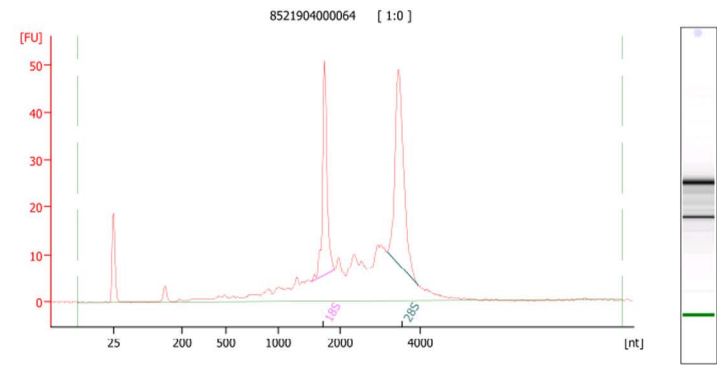

Overall Results for sample 8 : 8521904000064

|                         |           |                             |               |
|-------------------------|-----------|-----------------------------|---------------|
| RNA Area:               | 351.4     | RNA Integrity Number (RIN): | 8.4 (B.02.07) |
| RNA Concentration:      | 147 ng/ul | Result Flagging Color:      |               |
| rRNA Ratio [28s / 18s]: | 1.6       | Result Flagging Label:      | RIN: 8.40     |

Fragment table for sample 8 : 8521904000064

| Name | Start Size [nt] | End Size [nt] | Area | % of total Area |
|------|-----------------|---------------|------|-----------------|
| 18S  | 1,540           | 1,916         | 48.6 | 13.8            |
| 28S  | 3,190           | 3,951         | 79.3 | 22.6            |

Hypertrophy H5  
RIN= 8.9

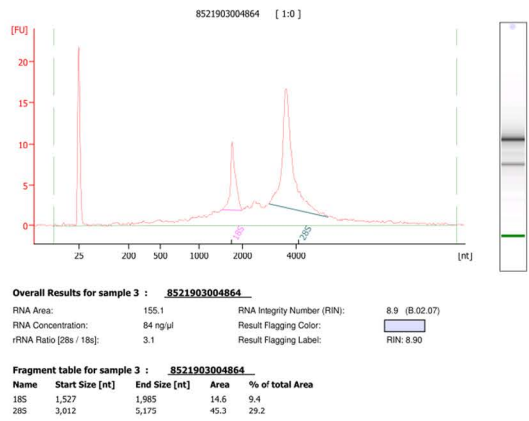

Hypertrophy H6  
RIN= 8.8

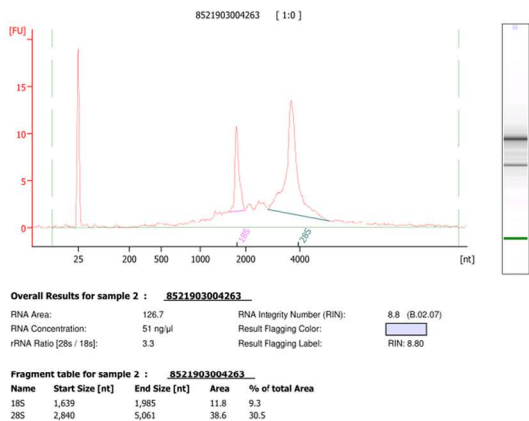

Hypertrophy H7  
RIN= 9.8

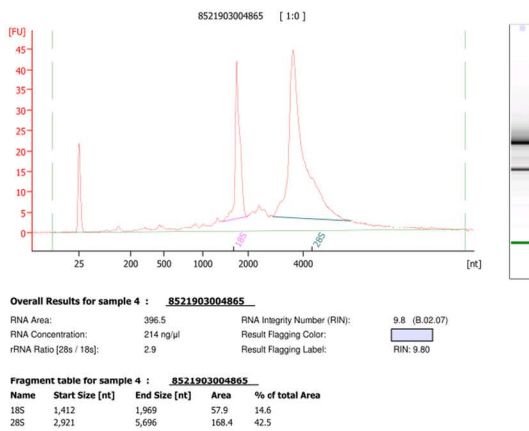

Hypertrophy S1H  
RIN= 8.5

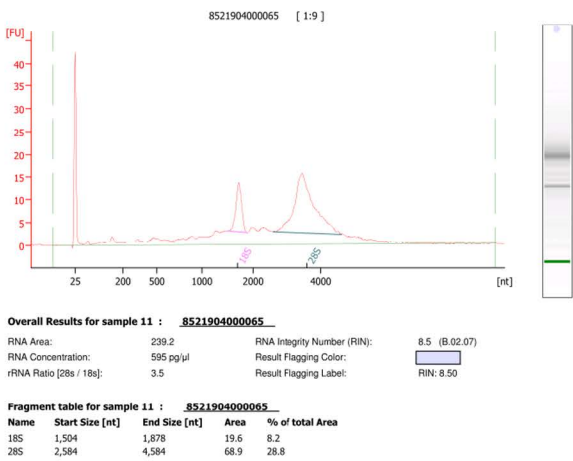

Diluted D11  
RIN= 8.4

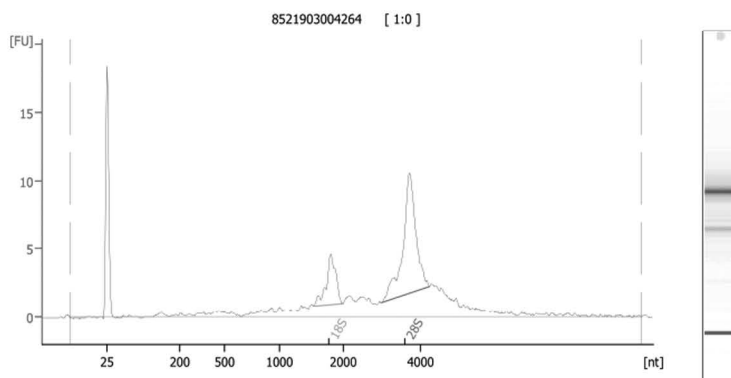

**Overall Results for sample 3 : 8521903004264**

|                         |          |                             |                                                                                                  |
|-------------------------|----------|-----------------------------|--------------------------------------------------------------------------------------------------|
| RNA Area:               | 90.1     | RNA Integrity Number (RIN): | 8.4 (B.02.07)                                                                                    |
| RNA Concentration:      | 36 ng/μl | Result Flagging Color:      | <div style="background-color: #cccccc; width: 20px; height: 10px; display: inline-block;"></div> |
| rRNA Ratio [28s / 18s]: | 2.9      | Result Flagging Label:      | RIN: 8.40                                                                                        |

**Fragment table for sample 3 : 8521903004264**

| Name | Start Size [nt] | End Size [nt] | Area | % of total Area |
|------|-----------------|---------------|------|-----------------|
| 18S  | 1,532           | 1,995         | 8.1  | 9.0             |
| 28S  | 3,018           | 4,238         | 23.8 | 26.4            |

Diluted D12  
RIN= 6.2

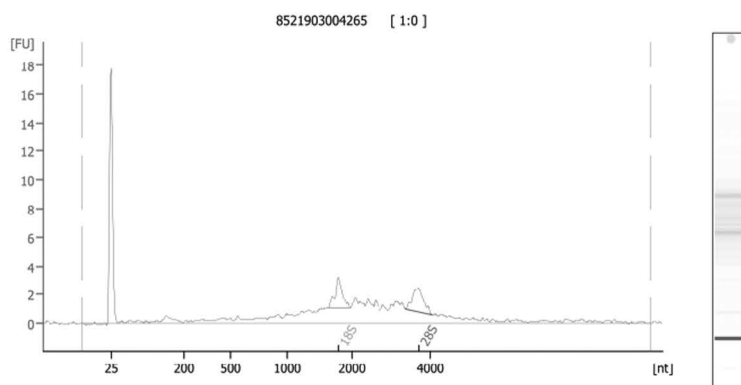

**Overall Results for sample 4 : 8521903004265**

|                         |          |                             |                                                                                                  |
|-------------------------|----------|-----------------------------|--------------------------------------------------------------------------------------------------|
| RNA Area:               | 54.0     | RNA Integrity Number (RIN): | 6.2 (B.02.07)                                                                                    |
| RNA Concentration:      | 22 ng/μl | Result Flagging Color:      | <div style="background-color: #cccccc; width: 20px; height: 10px; display: inline-block;"></div> |
| rRNA Ratio [28s / 18s]: | 1.0      | Result Flagging Label:      | RIN: 6.20                                                                                        |

**Fragment table for sample 4 : 8521903004265**

| Name | Start Size [nt] | End Size [nt] | Area | % of total Area |
|------|-----------------|---------------|------|-----------------|
| 18S  | 1,619           | 1,980         | 3.7  | 6.9             |
| 28S  | 3,371           | 4,065         | 3.8  | 7.0             |

Diluted S9D  
RIN= 9.4

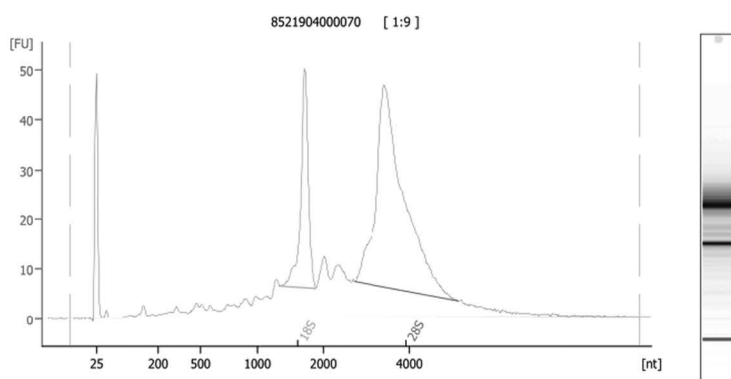

**Overall Results for sample 5 : 8521904000070**

|                         |             |                             |                                                                                                  |
|-------------------------|-------------|-----------------------------|--------------------------------------------------------------------------------------------------|
| RNA Area:               | 655.3       | RNA Integrity Number (RIN): | 9.4 (B.02.07)                                                                                    |
| RNA Concentration:      | 1,378 pg/μl | Result Flagging Color:      | <div style="background-color: #cccccc; width: 20px; height: 10px; display: inline-block;"></div> |
| rRNA Ratio [28s / 18s]: | 2.9         | Result Flagging Label:      | RIN: 9.40                                                                                        |

**Fragment table for sample 5 : 8521904000070**

| Name | Start Size [nt] | End Size [nt] | Area  | % of total Area |
|------|-----------------|---------------|-------|-----------------|
| 18S  | 1,345           | 1,889         | 83.5  | 12.7            |
| 28S  | 2,731           | 5,135         | 241.9 | 36.9            |

Diluted D13  
RIN=9.8

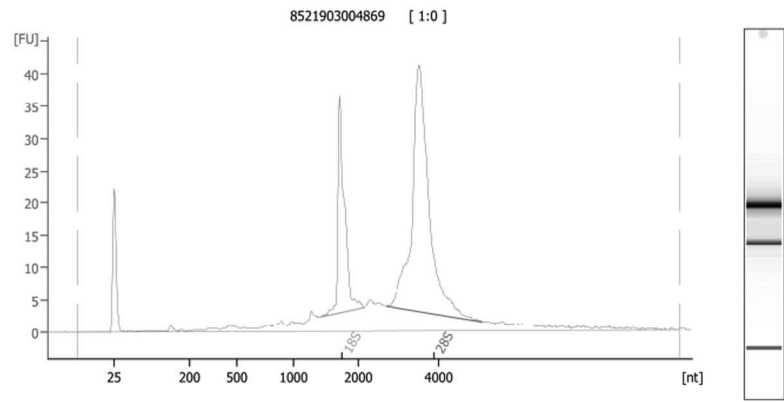

**Overall Results for sample 8 : 8521903004869**

|                         |           |                             |               |
|-------------------------|-----------|-----------------------------|---------------|
| RNA Area:               | 314.6     | RNA Integrity Number (RIN): | 9.8 (B.02.07) |
| RNA Concentration:      | 170 ng/µl | Result Flagging Color:      | <div></div>   |
| rRNA Ratio [28s / 18s]: | 2.5       | Result Flagging Label:      | RIN: 9.80     |

**Fragment table for sample 8 : 8521903004869**

| Name | Start Size [nt] | End Size [nt] | Area  | % of total Area |
|------|-----------------|---------------|-------|-----------------|
| 18S  | 1,403           | 2,140         | 51.9  | 16.5            |
| 28S  | 2,697           | 5,105         | 130.5 | 41.5            |

LV failure F14  
RIN= 8.1

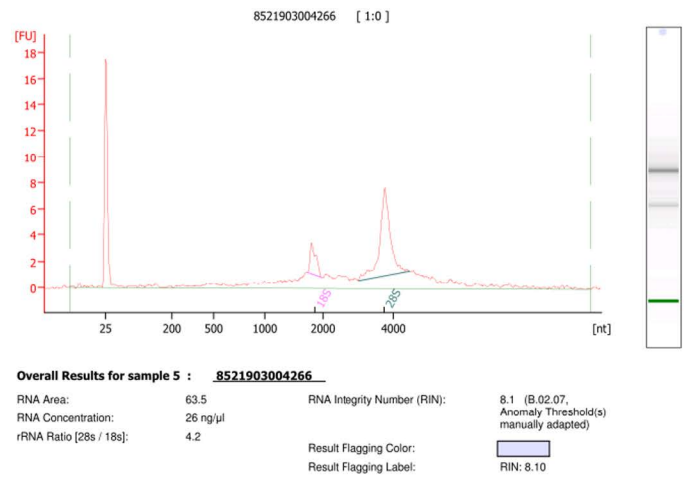

LV failure F15  
RIN= 9.5

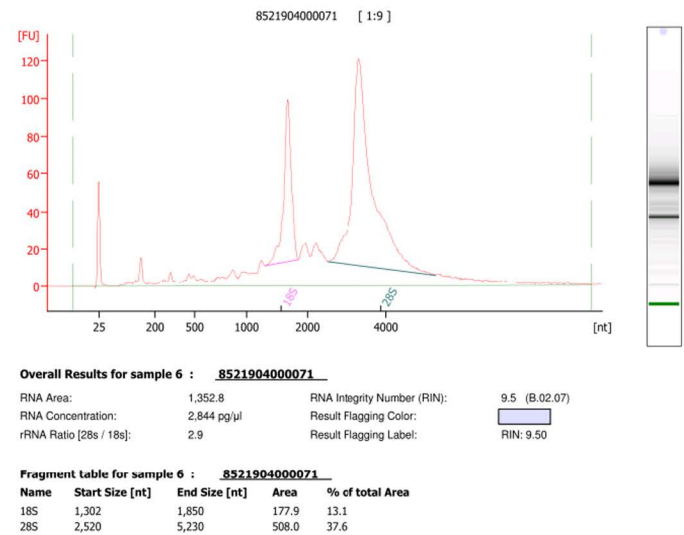

LV failure F16  
RIN= 8.3

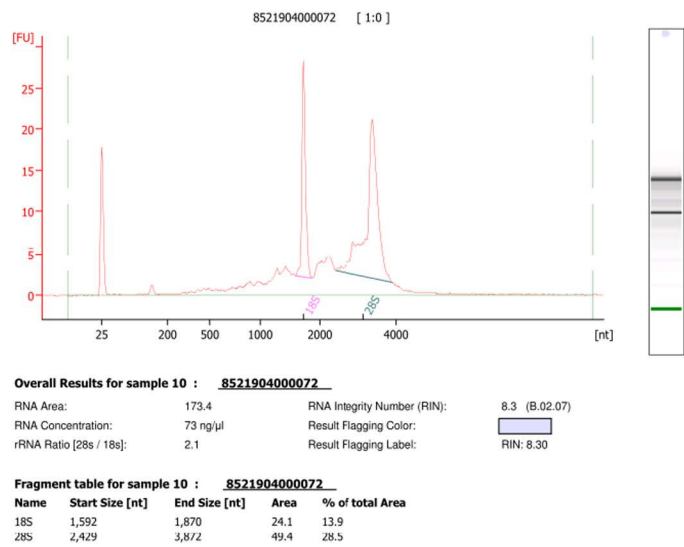

Recovery R8  
RIN=8.6

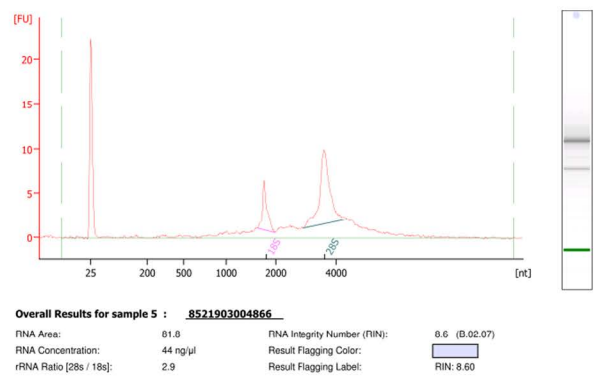

Recovery R9  
RIN=8.4

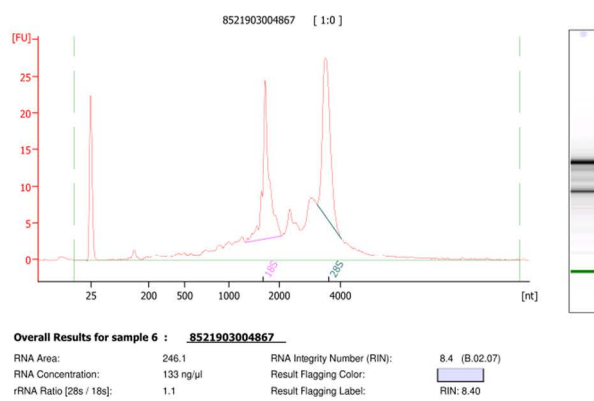

Recovery R10  
RIN=8.4

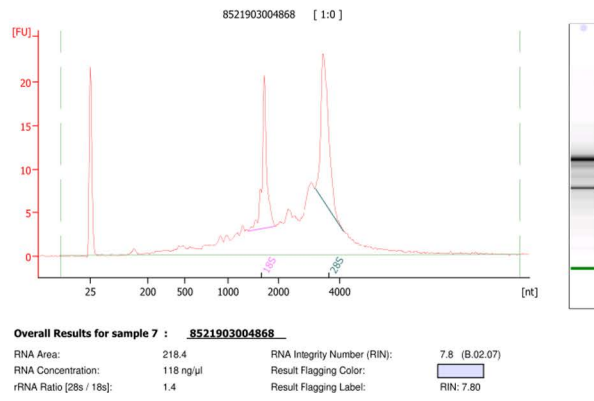

Supplement: Supplementary file 1 [file biomolecules-12-00731-s001.zip › Supplementary Figure S2 RNA quality and quantity.pdf]
