# Supplementary material for: Transcriptomal Insights of Heart Failure from Normality to Recovery
Source: Biomolecules. 2022 May 23;12(5):731. doi: 10.3390/biom12050731 (PMC9138767; doi:10.3390/biom12050731)
Supplement: Supplementary file 1 [file biomolecules-12-00731-s001.zip › Supplementary Tables.pdf]

**S. Table 1: List of significant genes**

| log2FC<br>(Hyp/Con) | Symbol       | log2FC<br>(Dil/Con) | Symbol       | log2FC<br>(Fail/Con) | Symbol       | log2FC<br>(Rec/Con) | Symbol       |
|---------------------|--------------|---------------------|--------------|----------------------|--------------|---------------------|--------------|
| 5.67                | TPT1         | 5.56                | TPT1         | 3.82                 | TPT1         | 2.82                | TARBP1       |
| 4.47                | NR4A3        | 2.99                | LOC114108841 | 3.79                 | SLN          | -1.23               | LOC101122330 |
| 3.87                | NR4A1        | 2.48                | LOC114108777 | 3.75                 | CD44         | -2.85               | MPC1         |
| 3.86                | FOS          | 2.37                | LOC101104705 | 3.39                 | TNNT1        | -3.92               | GON7         |
| 3.67                | ATF3         | 2.25                | FABP4        | 3.33                 | LGALS3       | -4.11               | LOC105605968 |
| 3.50                | NPPB         | 2.21                | SLN          | 2.92                 | TIMP1        |                     |              |
| 3.38                | OTUD1        | 2.07                | LGALS3       | 2.91                 | FABP4        |                     |              |
| 2.98                | LOC114113596 | 2.05                | TMEM205      | 2.91                 | ANKRD2       |                     |              |
| 2.98                | LGALS3       | 2.01                | TNNT1        | 2.79                 | HSPA1A       |                     |              |
| 2.91                | KLF4         | 1.99                | ADIRF        | 2.65                 | SERPINE2     |                     |              |
| 2.90                | SOX17        | 1.91                | LOC114108675 | 2.52                 | TUBB6        |                     |              |
| 2.75                | RASD1        | 1.84                | C6H4orf48    | 2.33                 | SLC39A8      |                     |              |
| 2.74                | APOLD1       | 1.84                | HSF4         | 2.33                 | UCP2         |                     |              |
| 2.67                | LOC101105609 | 1.75                | NGRN         | 2.28                 | THBS1        |                     |              |
| 2.63                | ABRA         | 1.72                | IGFBP5       | 2.27                 | ENAH         |                     |              |
| 2.62                | CSRNP1       | 1.71                | PROSER1      | 2.22                 | STK38L       |                     |              |
| 2.54                | IER2         | 1.68                | ERICH2       | 2.16                 | IGFBP4       |                     |              |
| 2.48                | ID2          | 1.66                | NOL3         | 2.07                 | CNN1         |                     |              |
| 2.45                | KLF10        | 1.61                | ID3          | 2.06                 | S100B        |                     |              |
| 2.44                | DUSP1        | 1.57                | LOC114112700 | 2.03                 | HIF1A        |                     |              |
| 2.43                | MYOT         | 1.54                | C15H11orf96  | 1.98                 | SYNPO2       |                     |              |
| 2.34                | KLF2         | 1.52                | ID1          | 1.98                 | ERRFI1       |                     |              |
| 2.31                | IGFBP5       | 1.51                | LOC114108775 | 1.98                 | ACOT9        |                     |              |
| 2.28                | C15H11orf96  | 1.49                | APOE         | 1.97                 | ATF3         |                     |              |
| 2.26                | BHLHE40      | 1.47                | GGT5         | 1.95                 | SLC1A5       |                     |              |
| 2.22                | ID3          | 1.42                | LOC114112251 | 1.94                 | LDHA         |                     |              |
| 2.20                | BTG2         | 1.39                | SRXN1        | 1.92                 | MMP2         |                     |              |
| 2.17                | SNAI2        | 1.37                | VWF          | 1.84                 | LOC114108675 |                     |              |
| 2.17                | ZFP36        | 1.35                | ID2          | 1.83                 | STK26        |                     |              |
| 2.11                | SGK1         | 1.33                | CINP         | 1.80                 | ARID5A       |                     |              |
| 2.09                | OVAR-DRB1    | 1.33                | S100B        | 1.79                 | ADAMTS1      |                     |              |
| 2.09                | ARID5A       | 1.30                | NQO2         | 1.77                 | TUBA1A       |                     |              |
| 2.01                | ID1          | 1.28                | THEM4        | 1.73                 | FKBP10       |                     |              |
| 2.00                | LOC101109747 | 1.25                | LOC114110633 | 1.68                 | PDLIM3       |                     |              |
| 1.99                | MYC          | 1.25                | JAM2         | 1.68                 | SMAD1        |                     |              |
| 1.98                | SAT1         | 1.23                | ZFP36L1      | 1.64                 | ITGAV        |                     |              |
| 1.98                | CIART        | 1.21                | APLP1        | 1.63                 | OLFML3       |                     |              |

|      |              |       |              |      |              |
|------|--------------|-------|--------------|------|--------------|
| 1.95 | CNTFR        | 1.17  | KLF2         | 1.61 | LRP1         |
| 1.90 | C1R          | 1.17  | CCT6A        | 1.59 | ABRA         |
| 1.88 | NPPA         | 1.15  | KLF4         | 1.57 | LITAF        |
| 1.87 | GADD45B      | 1.14  | FAM110D      | 1.56 | LOC101105064 |
| 1.87 | NRARP        | 1.08  | MAP1A        | 1.56 | MMRN1        |
| 1.84 | NFIL3        | 1.06  | PMP22        | 1.55 | TNFRSF1B     |
| 1.83 | ITPRIP       | 1.02  | RPS3         | 1.53 | UBQLN1       |
| 1.82 | LOC101104705 | 1.00  | TAF7         | 1.53 | SORT1        |
| 1.82 | TUBB6        | -1.00 | TUBA8        | 1.52 | SKP1-2       |
| 1.81 | RCAN1        | -1.00 | CCDC69       | 1.50 | VWF          |
| 1.80 | LOC101111832 | -1.00 | TUBA4A       | 1.48 | RASSF8       |
| 1.79 | MAFF         | -1.03 | C5H5orf63    | 1.48 | ENPP1        |
| 1.78 | SIK1         | -1.04 | LOC114109394 | 1.48 | ACTR3B       |
| 1.75 | LOC114108777 | -1.05 | COL1A1       | 1.45 | TIMP3        |
| 1.75 | LOC114108841 | -1.05 | DDIT4        | 1.45 | TMEM205      |
| 1.75 | LOC114118746 | -1.06 | TXNIP        | 1.43 | EIF4A1       |
| 1.72 | SMAD7        | -1.08 | LOC101114319 | 1.43 | BAG3         |
| 1.71 | KCNJ3        | -1.08 | HACD1        | 1.43 | SNAI2        |
| 1.70 | JUNB         | -1.11 | PPP1R15A     | 1.43 | PON2         |
| 1.67 | MUSTN1       | -1.12 | NFKBIA       | 1.43 | ACTN1        |
| 1.67 | DDIT4        | -1.14 | CDKN1A       | 1.43 | LOC105608622 |
| 1.67 | DZANK1       | -1.14 | DNAJB5       | 1.41 | SRGN         |
| 1.66 | FBXL17       | -1.18 | DUSP8        | 1.41 | STAT3        |
| 1.65 | NQO1         | -1.19 | COL3A1       | 1.40 | ZFP36L1      |
| 1.64 | HAND1        | -1.20 | LOC101108171 | 1.40 | SLC9A6       |
| 1.63 | NARS         | -1.30 | LOC101110855 | 1.40 | SRXN1        |
| 1.62 | SOCS1        | -1.31 | LOC101119130 | 1.40 | SULF2        |
| 1.60 | CCN1         | -1.32 | LOC101117554 | 1.39 | DZANK1       |
| 1.59 | IRS2         | -1.33 | GPT          | 1.37 | CYLD         |
| 1.54 | GEM          | -1.39 | GADD45G      | 1.36 | ARF4         |
| 1.52 | OVAR         | -1.53 | PDIA2        | 1.34 | LOC100101238 |
| 1.52 | IFRD1        | -1.53 | LOC101103401 | 1.34 | SPSB1        |
| 1.50 | PLVAP        | -1.55 | CISH         | 1.34 | ACSL4        |
| 1.48 | LOC101112038 | -1.61 | SUCLA2       | 1.34 | STK17A       |
| 1.46 | ARID5B       | -1.65 | ARHGDIG      | 1.33 | FYTTD1       |
| 1.46 | PDGFB        | -2.17 | MYL7         | 1.33 | PAPSS1       |
| 1.45 | FGGY         |       |              | 1.33 | B3GNT2       |
| 1.45 | LOC101113041 |       |              | 1.33 | TMEM100      |
| 1.44 | LOC114118747 |       |              | 1.33 | ENPP5        |
| 1.44 | KLF11        |       |              | 1.32 | NQO1         |
| 1.42 | LOC101118514 |       |              | 1.31 | CTSB         |

|      |              |  |  |      |              |
|------|--------------|--|--|------|--------------|
| 1.42 | IER5         |  |  | 1.29 | XIRP2        |
| 1.40 | TIPARP       |  |  | 1.29 | IL27RA       |
| 1.38 | JUN          |  |  | 1.28 | ACTA1        |
| 1.38 | CCDC197      |  |  | 1.27 | UFM1         |
| 1.37 | IL6R         |  |  | 1.27 | ATP6V1A      |
| 1.37 | C1S          |  |  | 1.27 | SNX16        |
| 1.37 | UBC          |  |  | 1.27 | GGT5         |
| 1.37 | SLC25A33     |  |  | 1.26 | MAP3K20      |
| 1.36 | DYRK3        |  |  | 1.26 | PLA2G12A     |
| 1.36 | PNRC1        |  |  | 1.26 | SHC2         |
| 1.36 | TNNT1        |  |  | 1.25 | AZIN1        |
| 1.34 | UBQLN1       |  |  | 1.25 | TEAD4        |
| 1.34 | SIAH2        |  |  | 1.25 | SLC31A1      |
| 1.33 | OSGIN1       |  |  | 1.25 | RHOJ         |
| 1.33 | LOC114110633 |  |  | 1.23 | TRAFFD1      |
| 1.31 | CTSW         |  |  | 1.23 | TMED3        |
| 1.30 | ERF          |  |  | 1.22 | CD9          |
| 1.29 | ARF4         |  |  | 1.22 | WFS1         |
| 1.29 | CCL5         |  |  | 1.21 | ITGA7        |
| 1.28 | BBS2         |  |  | 1.21 | SPECC1       |
| 1.28 | LOC114115357 |  |  | 1.18 | NARS         |
| 1.27 | SHC2         |  |  | 1.17 | NPNT         |
| 1.27 | BHLHE41      |  |  | 1.16 | ATP9A        |
| 1.27 | AFF4         |  |  | 1.16 | CTDSP2       |
| 1.27 | SYNPO2       |  |  | 1.15 | STC1         |
| 1.26 | LIMS1        |  |  | 1.15 | SGK1         |
| 1.26 | NOCT         |  |  | 1.14 | ERAP1        |
| 1.25 | TIMP3        |  |  | 1.14 | GJA5         |
| 1.25 | CDC42EP2     |  |  | 1.14 | AQP1         |
| 1.24 | UCP2         |  |  | 1.14 | PDGFC        |
| 1.22 | TUBA1A       |  |  | 1.14 | SORBS2       |
| 1.21 | SARAF        |  |  | 1.14 | SFXN1        |
| 1.21 | ARPP19       |  |  | 1.13 | CAPN2        |
| 1.20 | MMP2         |  |  | 1.12 | YWHAG        |
| 1.20 | PMP22        |  |  | 1.11 | HSPB6        |
| 1.20 | UBASH3A      |  |  | 1.11 | HSPB1        |
| 1.20 | LYPLA1       |  |  | 1.11 | ODF2         |
| 1.19 | SERPINB1     |  |  | 1.11 | ELMOD1       |
| 1.19 | SLC38A2      |  |  | 1.10 | SLC38A2      |
| 1.19 | LOC106990117 |  |  | 1.10 | LOC101102204 |
| 1.19 | ABHD14B      |  |  | 1.09 | SHB          |

|      |              |  |  |       |              |
|------|--------------|--|--|-------|--------------|
| 1.19 | GRASP        |  |  | 1.09  | FLNA         |
| 1.18 | HMG2         |  |  | 1.08  | SMAD7        |
| 1.18 | LOC101111528 |  |  | 1.08  | FBLN2        |
| 1.17 | ACTA1        |  |  | 1.08  | CXCL12       |
| 1.16 | PLK2         |  |  | 1.08  | WWTR1        |
| 1.15 | TFF2         |  |  | 1.07  | PPP1R14B     |
| 1.15 | IFITM5       |  |  | 1.07  | SYNPO2L      |
| 1.13 | ACKR3        |  |  | 1.07  | SRM          |
| 1.13 | SOX18        |  |  | 1.05  | TPD52        |
| 1.12 | SQSTM1       |  |  | 1.05  | GUCY1B1      |
| 1.12 | THBS1        |  |  | 1.05  | MYLIP        |
| 1.12 | LOC114117877 |  |  | 1.05  | TGFBR2       |
| 1.12 | IDS          |  |  | 1.04  | SPCS3        |
| 1.11 | ADAMTS1      |  |  | 1.04  | CD302        |
| 1.11 | LOC114111346 |  |  | 1.04  | ABTB2        |
| 1.11 | ZFAND5       |  |  | 1.02  | AP1S2        |
| 1.11 | FSTL3        |  |  | 1.02  | STEAP3       |
| 1.10 | HSF4         |  |  | 1.02  | PRELID3B     |
| 1.10 | CREM         |  |  | 1.02  | YIPF5        |
| 1.10 | GAS1         |  |  | 1.01  | KTN1         |
| 1.09 | KANK1        |  |  | 1.01  | KLF2         |
| 1.09 | MLLT11       |  |  | 1.00  | NEK6         |
| 1.08 | DLL4         |  |  | 1.00  | EFHD2        |
| 1.07 | CRYZ         |  |  | -1.00 | RPS19        |
| 1.07 | WFS1         |  |  | -1.00 | CKM          |
| 1.06 | PLP2         |  |  | -1.00 | COQ9         |
| 1.06 | NEIL2        |  |  | -1.01 | NEMF         |
| 1.06 | CX3CL1       |  |  | -1.02 | SMDT1        |
| 1.06 | LOC100101238 |  |  | -1.03 | LOC114109396 |
| 1.05 | TMEM159      |  |  | -1.03 | THAP7        |
| 1.05 | LITAF        |  |  | -1.03 | HAND1        |
| 1.05 | LOC101120481 |  |  | -1.04 | SH3RF2       |
| 1.05 | CEBPD        |  |  | -1.04 | SESN1        |
| 1.05 | ENAH         |  |  | -1.04 | TEF          |
| 1.05 | SLC2A3       |  |  | -1.04 | AKAP1        |
| 1.04 | NPNT         |  |  | -1.05 | LOC101117028 |
| 1.04 | XIRP1        |  |  | -1.05 | POLR3H       |
| 1.04 | CCDC112      |  |  | -1.05 | IVD          |
| 1.04 | SERINC5      |  |  | -1.05 | LPCAT3       |
| 1.04 | LOC114108708 |  |  | -1.06 | MYO18B       |
| 1.03 | GPR157       |  |  | -1.07 | CIB2         |

|       |              |  |  |       |              |
|-------|--------------|--|--|-------|--------------|
| 1.03  | CCDC190      |  |  | -1.07 | ASMTL        |
| 1.02  | NELFCD       |  |  | -1.07 | GCAT         |
| 1.02  | NOL3         |  |  | -1.08 | EARS2        |
| 1.01  | PRSS23       |  |  | -1.09 | FAM81A       |
| 1.01  | KLHL41       |  |  | -1.09 | DBNDD1       |
| 1.00  | MAPK1IP1L    |  |  | -1.09 | CRIP2        |
| 1.00  | SEPTIN9      |  |  | -1.10 | USP2         |
| -1.00 | PPP1R3B      |  |  | -1.11 | THAP4        |
| -1.00 | THAP4        |  |  | -1.12 | EIF4EBP1     |
| -1.01 | LOC114112897 |  |  | -1.13 | GPAT4        |
| -1.02 | G RTP1       |  |  | -1.14 | AS3MT        |
| -1.02 | MYH7B        |  |  | -1.14 | PABPC4       |
| -1.02 | KCNJ5        |  |  | -1.15 | LYVE1        |
| -1.03 | LOC114111775 |  |  | -1.15 | IRX5         |
| -1.03 | DYNC2LI1     |  |  | -1.15 | LOC101117657 |
| -1.04 | THAP3        |  |  | -1.15 | RXRG         |
| -1.06 | ANKRD12      |  |  | -1.15 | SLC25A33     |
| -1.06 | RBFOX3       |  |  | -1.16 | CSDC2        |
| -1.07 | LOC101105958 |  |  | -1.16 | FAM234A      |
| -1.08 | CCDC69       |  |  | -1.16 | RPS12        |
| -1.08 | MCAT         |  |  | -1.16 | GCSH         |
| -1.08 | MBD3         |  |  | -1.19 | LOC114110327 |
| -1.10 | PEBP4        |  |  | -1.19 | TRIM63       |
| -1.11 | LOC101106131 |  |  | -1.19 | CAVIN4       |
| -1.12 | MZT2B        |  |  | -1.19 | ACAP1        |
| -1.12 | PDIA2        |  |  | -1.20 | KCNQ1        |
| -1.12 | S100A1       |  |  | -1.20 | WBP1         |
| -1.17 | LUC7L3       |  |  | -1.21 | GREB1L       |
| -1.17 | LOC101123116 |  |  | -1.22 | UROS         |
| -1.18 | LOC101112491 |  |  | -1.22 | MCAT         |
| -1.21 | LOC101117527 |  |  | -1.22 | CTF1         |
| -1.33 | LOC114110252 |  |  | -1.22 | SPR          |
| -1.35 | LOC114109394 |  |  | -1.22 | SLC22A3      |
| -1.37 | FBXL22       |  |  | -1.22 | FSD2         |
| -1.46 | UCHL3        |  |  | -1.22 | ARVCF        |
| -1.50 | LOC101120580 |  |  | -1.23 | LOC101114579 |
| -1.51 | PKDCC        |  |  | -1.23 | MYL3         |
| -1.54 | LOC114113983 |  |  | -1.24 | GYPC         |
| -1.57 | ARHGDIG      |  |  | -1.26 | LOC114109394 |
| -1.60 | CISH         |  |  | -1.26 | MPND         |
| -1.61 | RASL11B      |  |  | -1.27 | FAAP20       |

|       |              |  |  |       |              |
|-------|--------------|--|--|-------|--------------|
| -1.61 | STARD10      |  |  | -1.31 | PLEKHA6      |
| -1.63 | RAD51B       |  |  | -1.31 | LOC114109996 |
| -1.77 | ADRB1        |  |  | -1.32 | LOC101106374 |
| -1.78 | MAPK12       |  |  | -1.32 | LOC101111664 |
| -1.80 | PON3         |  |  | -1.33 | LOC101111733 |
| -2.09 | LOC101113217 |  |  | -1.34 | SLC25A34     |
| -2.24 | SYN1         |  |  | -1.35 | SLC25A42     |
| -2.70 | LOC114108618 |  |  | -1.36 | PHKG1        |
| -2.79 | LOC114109396 |  |  | -1.37 | INHA         |
|       |              |  |  | -1.38 | LENG1        |
|       |              |  |  | -1.38 | PXMP2        |
|       |              |  |  | -1.38 | METTTL22     |
|       |              |  |  | -1.38 | SLC38A3      |
|       |              |  |  | -1.38 | TCEA3        |
|       |              |  |  | -1.39 | LOC101107260 |
|       |              |  |  | -1.41 | NUDT8        |
|       |              |  |  | -1.42 | GTPBP6       |
|       |              |  |  | -1.43 | PPP1R1A      |
|       |              |  |  | -1.44 | DUSP8        |
|       |              |  |  | -1.44 | EGR1         |
|       |              |  |  | -1.44 | FBXL22       |
|       |              |  |  | -1.44 | CENPP        |
|       |              |  |  | -1.45 | LOC101106131 |
|       |              |  |  | -1.46 | MNS1         |
|       |              |  |  | -1.48 | MLF1         |
|       |              |  |  | -1.48 | MYLK3        |
|       |              |  |  | -1.48 | MDK          |
|       |              |  |  | -1.48 | UBALD1       |
|       |              |  |  | -1.51 | PIGZ         |
|       |              |  |  | -1.52 | MCF2L        |
|       |              |  |  | -1.54 | DBP          |
|       |              |  |  | -1.54 | PACRG        |
|       |              |  |  | -1.58 | LOC101120496 |
|       |              |  |  | -1.62 | INSYN1       |
|       |              |  |  | -1.63 | PCDH12       |
|       |              |  |  | -1.65 | ACSS1        |
|       |              |  |  | -1.65 | F3           |
|       |              |  |  | -1.70 | SLC2A4RG     |
|       |              |  |  | -1.73 | CTH          |
|       |              |  |  | -1.76 | LOC101105114 |
|       |              |  |  | -1.81 | HBB          |

|  |  |  |  |       |              |
|--|--|--|--|-------|--------------|
|  |  |  |  | -1.85 | METTL11B     |
|  |  |  |  | -1.93 | DQA          |
|  |  |  |  | -1.94 | RAMP1        |
|  |  |  |  | -1.95 | CHST2        |
|  |  |  |  | -1.95 | CISH         |
|  |  |  |  | -1.95 | CITED1       |
|  |  |  |  | -2.00 | SBK2         |
|  |  |  |  | -2.04 | FRMD5        |
|  |  |  |  | -2.23 | LOC101116024 |
|  |  |  |  | -2.65 | RAD51B       |
|  |  |  |  | -2.91 | RBFOX3       |
|  |  |  |  | -3.00 | PDIA2        |
|  |  |  |  | -3.04 | LOC101107831 |
|  |  |  |  | -3.46 | LOC101121371 |

**S. Table 2 : Hypertrophy GO analysis by Metascape**

|                         | Description                                              | Hits                                                                                                                                                | Log(q-value) |
|-------------------------|----------------------------------------------------------|-----------------------------------------------------------------------------------------------------------------------------------------------------|--------------|
| GO Biological Processes | circadian rhythm                                         | ADRB1 CREM ID1 ID2 ID3 JUN NFIL3 SIAH2 KLF10 BHLHE40 NOCT FBXL17 BHLHE41 GPR157 CIART SIK1 FBXL22                                                   | -9.1         |
| GO Biological Processes | blood vessel development                                 | NR4A1 ID1 CCN1 IL6R JUN JUNB SMAD7 MMP2 NPPB PDGFB S100A1 SAT1 CX3CL1 THBS1 KLF4 HAND1 ADAMTS1 KLF2 PLK2 TIPARP SOX18 DLL4 ACKR3 SOX17 APOLD1 NRARP | -7.6         |
| GO Biological Processes | positive regulation of smooth muscle cell proliferation  | ID2 IGFBP5 IL6R JUN MMP2 PDGFB CCL5 CX3CL1 THBS1 NR4A3 ADAMTS1                                                                                      | -6.7         |
| GO Biological Processes | muscle structure development                             | ACTA1 ATF3 CNTFR FOS ID2 ID3 IFRD1 IGFBP5 SMAD7 NPPA PDGFB MAPK12 TNNT1 BTG2 HAND1 KLHL41 MAFF DLL4 BHLHE41 ARID5B SIK1 NPNT                        | -6.1         |
| Canonical Pathways      | PID AP1 PATHWAY                                          | ACTA1 ATF3 DUSP1 FOS CCN1 JUN JUNB MYC NPPA                                                                                                         | -5.9         |
| GO Biological Processes | regulation of ossification                               | CEBPD ID1 ID2 ID3 IGFBP5 CCN1 IL6R SMAD7 SNAI2 NOCT PKDCC NPNT IFITM5                                                                               | -5.8         |
| GO Biological Processes | response to growth factor                                | FOS GAS1 NR4A1 ID1 CCN1 JUN LIMS1 SMAD7 MYC PDGFB CCL5 SNAI2 THBS1 UBC ZFP36 KLF4 IER2 FSTL3 DDIT4 DLL4 RASL11B NPNT                                | -5.6         |
| GO Biological Processes | negative regulation of intracellular signal transduction | ATF3 RCAN1 DUSP1 MYC NPPA SNAI2 THBS1 TIMP3 TPT1 WFS1 DYRK3 SOCS1 NOL3 KLF4 LITAF KANK1 DDIT4 ACKR3                                                 | -4.6         |
| GO Biological Processes | regulation of DNA-binding transcription factor activity  | FOS ID1 ID2 ID3 JUN SMAD7 CX3CL1 SGK1 UBC WFS1 BHLHE40 KLF4 HAND1 ARID5B ABRA SIK1                                                                  | -4.6         |
| GO Biological Processes | kidney development                                       | ID2 ID3 IL6R SMAD7 MYC PDGFB WFS1 ADAMTS1 FSTL3 TIPARP SOX17 ARID5B NPNT                                                                            | -4.6         |
| GO Biological Processes | fat cell differentiation                                 | ADRB1 BBS2 CEBPD NR4A1 ID2 SNAI2 ZFP36 NR4A3 SOCS1 KLF4 NOCT ARID5B                                                                                 | -4.5         |

|                         |                                             |                                                                                                               |      |
|-------------------------|---------------------------------------------|---------------------------------------------------------------------------------------------------------------|------|
| GO Biological Processes | epithelial cell proliferation               | SERPINB1 NR4A1 ID1 ID2 IGFBP5 JUN LIMS1 MYC PDGFB CCL5 SNAI2 THBS1 ZFP36 NR4A3 DLL4 NRARP                     | -4.5 |
| GO Biological Processes | positive regulation of cell death           | ATF3 NQO1 DUSP1 FOS ID3 CCN1 JUN MYC GADD45B CCL5 THBS1 TIMP3 UBC NR4A3 KLF11 SQSTM1 MLLT11 OSGIN1 DDIT4 SIK1 | -4.5 |
| GO Biological Processes | extrinsic apoptotic signaling pathway       | ATF3 IL6R LGALS3 CX3CL1 SIAH2 SNAI2 THBS1 TIMP3 NOL3 MLLT11 ITPRIP                                            | -3.8 |
| KEGG Pathway            | Fluid shear stress and atherosclerosis      | NQO1 DUSP1 FOS JUN MMP2 PDGFB MAPK12 SQSTM1 KLF2                                                              | -3.8 |
| GO Biological Processes | Circadian Clock                             | CREM NFIL3 UBC BHLHE40 NOCT BHLHE41 SIK1                                                                      | -3.8 |
| GO Biological Processes | negative regulation of cell differentiation | ID1 ID2 ID3 IFRD1 IGFBP5 SMAD7 MYC PDGFB PMP22 CX3CL1 SNAI2 ZFP36 SOCS1 FSTL3 PLK2 KANK1 NOCT BHLHE41 NRARP   | -3.7 |
| Canonical Pathways      | PID IL6 7 PATHWAY                           | CEBPD FOS IL6R JUN JUNB MYC                                                                                   | -3.6 |
| GO Biological Processes | connective tissue development               | BBS2 ID2 CCN1 IL6R SMAD7 PDGFB SNAI2 HAND1 ARID5B PKDCC MUSTN1                                                | -3.4 |
| GO Biological Processes | heart development                           | ID1 ID2 ID3 CCN1 JUN SMAD7 NPPA PDGFB SNAI2 HAND1 ADAMTS1 MBD3 SOX18 DLL4 SOX17 SIK1                          | -3.4 |

**S. Table 3 : Dilated GO analysis by Metascape**

| Category                | Description                                            | Hits                                                         | Log(q-value) |
|-------------------------|--------------------------------------------------------|--------------------------------------------------------------|--------------|
| GO Biological Processes | cellular response to organic cyclic compound           | APLP1 ZFP36L1 COL1A1 ID1 ID3 IGFBP5 TAF7 KLF4 KLF2 DDIT4     | -2.9         |
| GO Biological Processes | negative regulation of protein modification process    | APOE CDKN1A DUSP8 FABP4 LGALS3 RPS3 TAF7 KLF4 PPP1R15A DDIT4 | -2.3         |
| GO Biological Processes | response to toxic substance                            | APOE CDKN1A COL1A1 RPS3 KLF4 KLF2 TXNIP ADIRF SRXN1          | -2.2         |
| GO Biological Processes | negative regulation of cell differentiation            | APOE ZFP36L1 COL3A1 ID1 ID2 ID3 IGFBP5 NFKBIA PMP22 S100B    | -2.1         |
| GO Biological Processes | response to steroid hormone                            | ZFP36L1 CDKN1A COL1A1 S100B TAF7 TXNIP DDIT4                 | -2           |
| Reactome Gene Sets      | Scavenging by Class A Receptors                        | APOE COL1A1 COL3A1                                           | -2           |
| Reactome Gene Sets      | Formation of tubulin folding intermediates by CCT/TriC | CCT6A TUBA4A TUBA8                                           | -1.8         |
| GO Biological Processes | intrinsic apoptotic signaling pathway                  | CDKN1A RPS3 TPT1 NOL3 PPP1R15A DDIT4                         | -1.7         |
| GO Biological Processes | regulation of smooth muscle cell proliferation         | CDKN1A ID2 IGFBP5 NQO2 KLF4                                  | -1.7         |
| GO Biological Processes | muscle structure development                           | ZFP36L1 COL3A1 ID2 ID3 IGFBP5 S100B TNNT1 JAM2               | -1.5         |
| GO Biological Processes | memory                                                 | APOE MAP1A NQO2 S100B                                        | -1.3         |
| GO Biological Processes | fat cell differentiation                               | ZFP36L1 FABP4 ID2 KLF4 ADIRF                                 | -1.3         |

|                         |                                                               |                                                |       |
|-------------------------|---------------------------------------------------------------|------------------------------------------------|-------|
| GO Biological Processes | positive regulation of cell death                             | CDKN1A ID3 NQO2 RPS3 S100B TXNIP GADD45G DDIT4 | -1.3  |
| GO Biological Processes | cold-induced thermogenesis                                    | FABP4 ID1 SLN GADD45G                          | -1.2  |
| GO Biological Processes | protein localization to nucleus                               | CCT6A CDKN1A COL1A1 NFKBIA TXNIP               | -1.2  |
| GO Biological Processes | negative regulation of cell adhesion                          | ARHGDIG COL1A1 LGALS3 KLF4 JAM2                | -1.1  |
| GO Biological Processes | supramolecular fiber organization                             | APOE COL1A1 COL3A1 ID1 MAP1A RPS3 TNNT1        | -0.9  |
| GO Biological Processes | regulation of cellular amide metabolic process                | APOE ZFP36L1 IGFBP5 RPS3 PPP1R15A NGRN         | -0.88 |
| GO Biological Processes | PI3K-Akt signaling pathway                                    | CDKN1A COL1A1 VWF DDIT4 THEM4                  | -0.86 |
| Reactome Gene Sets      | Transcriptional regulation of white adipocyte differentiation | FABP4 KLF4 ADIRF                               | -0.85 |

**S. Table 4 : Failure GO analysis by metascape**

| Category                | Description                                        | Hits                                                                                                                                                             | Log(q-value) |
|-------------------------|----------------------------------------------------|------------------------------------------------------------------------------------------------------------------------------------------------------------------|--------------|
| GO Biological Processes | muscle structure development                       | ACTA1 ATF3 ZFP36L1 CAPN2 CD9 CTF1 CTH EGR1 ITGA7 SMAD7 MYL3 SORT1 S100B TEAD4 TGFB2 TNNT1 SORBS2 USP2 HAND1 ANKRD2 PDLIM3 SYNPO2L MYO18B MYLK3 XIRP2 NPNT CAVIN4 | -6.3         |
| GO Biological Processes | blood vessel morphogenesis                         | AQP1 ZFP36L1 F3 GJA5 HIF1A HSPB1 ITGAV LRP1 SMAD1 SMAD7 MDK MMP2 CITED1 SHB STAT3 TGFB2 THBS1 HAND1 ADAMTS1 RAMP1 KLF2 ERAP1 TMEM100 RHOJ MYO18B HSPB6           | -5.5         |
| GO Biological Processes | apoptotic signaling pathway                        | ATF3 CD44 CTH CYLD HIF1A HSPA1A HSPB1 ITGAV LGALS3 SRGN SORT1 CXCL12 SNAI2 THBS1 TIMP3 TNFRSF1B TPT1 WFS1 YWHAG BAG3 ANKRD2 UBQLN1                               | -4.4         |
| GO Biological Processes | response to wounding                               | ACTN1 ARF4 ZFP36L1 CD9 CD44 F3 FLNA HBB HIF1A HSPB1 LRP1 MDK SERPINE2 RAD51B TGFB2 THBS1 TIMP1 VWF AKAP1 PABPC4 LYVE1 MMRN1 SULF2                                | -4           |
| GO Biological Processes | regulation of muscle system process                | CNN1 FLNA GJA5 KCNQ1 SMAD7 MYL3 SLN STC1 TNFRSF1B TNNT1 ERRF1 TRIM63 HSPB6 NPNT                                                                                  | -4           |
| GO Biological Processes | cellular response to organonitrogen compound       | ACTA1 AQP1 ATP6V1A ZFP36L1 CAPN2 EGR1 EIF4EBP1 KCNQ1 LRP1 MMP2 ENPP1 STAT3 STC1 UROS YWHAG KLF2 CIB2 SESN1 ERRF1 PDGFC SLC25A33                                  | -4           |
| GO Biological Processes | response to oxygen levels                          | AQP1 ATP6V1A ZFP36L1 CAPN2 EGR1 EIF4EBP1 HIF1A LDHA MMP2 S100B CXCL12 STC1 TGFB2 THBS1 UCP2 UBQLN1                                                               | -3.5         |
| GO Biological Processes | response to oxidative stress                       | AQP1 CAPN2 NQO1 GUCY1B1 HBB HIF1A HSPA1A HSPB1 LDHA MMP2 PON2 KLF2 ANKRD2 SESN1 UBQLN1 STK26 SRXN1                                                               | -3.4         |
| GO Biological Processes | skeletal system development                        | CD44 GJA5 HIF1A INHA SMAD1 SMAD7 MDK MMP2 SNAI2 STC1 TEAD4 TGFB2 TIMP1 PAPSS1 HAND1 IRX5 SULF2 PDGFC                                                             | -3.4         |
| GO Biological Processes | negative regulation of phosphate metabolic process | ATF3 CYLD DUSP8 FABP4 HSPB1 INHA LGALS3 SMAD7 ENPP1 PPP1R1A STAT3 TIMP3 YWHAG CTDSP2 WWTR1 PPP1R14B ERRF1 DBNDD1 SH3RF2                                          | -3.2         |

|                         |                                                                  |                                                                                                                            |      |
|-------------------------|------------------------------------------------------------------|----------------------------------------------------------------------------------------------------------------------------|------|
| Reactome Gene Sets      | extracellular matrix organization                                | CAPN2 CD44 FBLN2 ITGA7 ITGAV LRP1 MMP2 THBS1 TIMP1 TNFRSF1B VWF ADAMTS1 SULF2 SLC39A8 NPNT                                 | -3   |
| GO Biological Processes | actin cytoskeleton organization                                  | ACTA1 ACTN1 AQP1 CNN1 FLNA LRP1 MDK CXCL12 TNNT1 SORBS2 PDLIM3 ENAH ACTR3B RHOJ SYNPO2L FRMD5 MYLK3 SPECC1 XIRP2 SYNPO2    | -3   |
| GO Biological Processes | Ferroptosis                                                      | F3 ACSL4 LPCAT3 SLC38A2 STEAP3 SLC39A8                                                                                     | -3   |
| CORUM                   | VEGF transcriptional complex                                     | HIF1A CITED1 STAT3                                                                                                         | -2.9 |
| GO Biological Processes | extrinsic apoptotic signaling pathway                            | ATF3 CYLD HSPA1A ITGAV LGALS3 SORT1 SNAI2 THBS1 TIMP3 TNFRSF1B BAG3                                                        | -2.8 |
| GO Biological Processes | transmembrane receptor protein tyrosine kinase signaling pathway | ARF4 ATP6V1A EIF4EBP1 F3 HIF1A HSPB1 IGFBP4 ITGAV LRP1 MMP2 ENPP1 SORT1 SHB STAT3 THBS1 SLC9A6 SHC2 ERRFI1 SULF2 PDGFC     | -2.6 |
| GO Biological Processes | reactive oxygen species metabolic process                        | ARF4 NQO1 HBB HIF1A SPR STAT3 TGFB2 THBS1 STK17A KLF2 SESN1 SLC25A33                                                       | -2.6 |
| GO Biological Processes | cellular response to growth factor stimulus                      | ZFP36L1 CD44 EGR1 HIF1A HSPA1A HSPB1 SMAD1 SMAD7 CITED1 SORT1 SNAI2 TGFB2 THBS1 TNFRSF1B SLC9A6 ERRFI1 TMEM100 SULF2 NPNT  | -2.5 |
| GO Biological Processes | renal system process                                             | AQP1 GJA5 HBB KCNQ1 SGK1 STC1 WFS1 SULF2                                                                                   | -2.4 |
| GO Biological Processes | anion transport                                                  | AQP1 FABP4 ACSL4 HBB ENPP1 SLC1A5 SLC22A3 STC1 THBS1 ATP9A SLC9A6 SLC38A3 PRELID3B SLC38A2 SLC39A8 PLA2G12A SFXN1 SLC25A42 | -2.4 |

**S. Table 5 : Diseases associated with significantly expressed genes in Hypertrophy stage**

| Description                                         | Hits                                                                                                                                        | Log(q-value) |
|-----------------------------------------------------|---------------------------------------------------------------------------------------------------------------------------------------------|--------------|
| Endotoxemia                                         | ATF3 CREM SERPINB1 FOS NR4A1 IGFBP5 IL6R JUN JUNB LGALS3 MMP2 CCL5 CX3CL1 TIMP3 SQSTM1 ADAMTS1 KLF2 DDIT4 ACKR3 SOX17                       | -8.7         |
| Anoxia                                              | DUSP1 FOS CCN1 JUN MYC NPPA PDGFB CX3CL1 SGK1 SIAH2 SLC2A3 THBS1 UCP2 BHLHE40 DDIT4 PDIA2 BHLHE41                                           | -8.2         |
| Myocardial Ischemia                                 | ADRB1 CEBPD RCAN1 DUSP1 NR4A1 ID1 ID3 IFRD1 CCN1 JUNB LGALS3 NPPA NPPB RAD51B CX3CL1 KLF10 UCP2 ZFP36 TUBA1A BHLHE40 KLF4 PRSS23 DDIT4 DLL4 | -7           |
| Vascular inflammations                              | DUSP1 FOS NR4A1 JUN JUNB LGALS3 SMAD7 MMP2 CX3CL1 SGK1 TIMP3 ZFP36 KLF4 KLF2 DDIT4 DLL4                                                     | -6.9         |
| Cardiomyopathy, Familial Idiopathic                 | ADRB1 DUSP1 FOS KCNJ5 LGALS3 MMP2 MYC NPPA NPPB S100A1 SNAI2 THBS1 TIMP3 UCP2 SQSTM1 KLF4 HAND1 SOX18 ACKR3 CSRNP1 ABRA SIK1 XIRP1          | -6.1         |
| Polyarthritis, Juvenile, Rheumatoid Factor Negative | CREM DUSP1 FOS JUN SLC2A3 THBS1 NR4A3 KLF4 PLK2 MAFF SIK1                                                                                   | -6.1         |
| Polyarthritis, Juvenile, Rheumatoid Factor Positive | CREM DUSP1 FOS JUN SLC2A3 THBS1 NR4A3 KLF4 PLK2 MAFF SIK1                                                                                   | -6.1         |
| Juvenile-Onset Still Disease                        | CREM DUSP1 FOS IL6R JUN SLC2A3 THBS1 NR4A3 KLF4 PLK2 MAFF SIK1                                                                              | -6           |
| Juvenile psoriatic arthritis                        | CREM DUSP1 FOS JUN SLC2A3 THBS1 NR4A3 KLF4 PLK2 MAFF SIK1                                                                                   | -5.9         |
| Lung diseases                                       | NQO1 DUSP1 SERPINB1 FOS NR4A1 IFRD1 IGFBP5 JUN JUNB LGALS3 SMAD7 MMP2 CCL5 CX3CL1 TFF2 KLF10 TIMP3 KLF2 AFF4 ACKR3 NPNT                     | -5.5         |
| Diabetes Mellitus, Experimental                     | ADRB1 ATF3 NQO1 DUSP1 ID1 LGALS3 MMP2 MYC NPPA NPPB PDGFB CX3CL1 SLC2A3 THBS1 UCP2 IRS2 LITAF SLC38A2                                       | -5.3         |
| Reperfusion Injury                                  | ADRB1 ATF3 FOS ID3 IL6R JUN SAT1 CCL5 CX3CL1 SLC2A3 THBS1 TIMP3 BTG2 SOCS1                                                                  | -5.2         |
| Vascular Diseases                                   | FOS NR4A1 IGFBP5 CCN1 IL6R JUN JUNB LGALS3 MMP2 NPPB S100A1 SGK1 THBS1 UCP2 KLF4 KLF2 SOX18 DLL4 ACKR3 SYNPO2                               | -5           |

|                                                                                                        |                                                                                                                    |      |
|--------------------------------------------------------------------------------------------------------|--------------------------------------------------------------------------------------------------------------------|------|
| Pancreatic Neoplasm                                                                                    | NQO1 DUSP1 GEM NR4A1 ID1 CCN1 IL6R JUN LGALS3 SMAD7 MMP2 MYC S100A1 TFF2 THBS1 BHLHE40 SOCS1 IRS2 KLF4 LYPLA1 MCAT | -5   |
| Juvenile arthritis                                                                                     | CREM DUSP1 FOS GEM IL6R JUN MMP2 S100A1 CCL5 SLC2A3 THBS1 NR4A3 KLF4 PLK2 MAFF SIK1                                | -4.7 |
| Immune System Diseases                                                                                 | CISH RCAN1 FOS GEM NR4A1 JUN JUNB PMP22 S100A1 CCL5 CX3CL1 THBS1 NR4A3 SOCS1 KLF4 UBASH3A                          | -4.7 |
| Classical Hodgkin's Lymphoma                                                                           | ATF3 CEBPD FOS GEM ID2 JUN JUNB MYC CCL5 TIMP3 SOCS1 KLF4 SEPTIN9                                                  | -4.6 |
| Helicobacter pylori (H. pylori) infection in conditions classified elsewhere and of unspecified site   | ATF3 CRYZ NQO1 FOS IDS JUN JUNB LGALS3 SMAD7 MYC CCL5 SGK1 SIAH2 TFF2 THBS1 SQSTM1 NOL3 KLF4                       | -4.6 |
| Impaired glucose tolerance                                                                             | ATF3 CISH SERPINB1 IGFBP5 LGALS3 SMAD7 NFIL3 SAT1 CCL5 SGK1 SLC2A3 THBS1 KLF10 UCP2 WFS1 NR4A3 KLF11 IRS2          | -4.6 |
| Respiratory syncytial virus (RSV) infection in conditions classified elsewhere and of unspecified site | CISH CRYZ NQO1 DUSP1 FOS JUN MMP2 CCL5 CX3CL1 THBS1 ZFP36 SOCS1 DLL4 PDIA2 SLC25A33 RBFOX3                         | -4.5 |

**S. Table 6 : Diseases associated with significantly expressed genes in Dilated stage**

| Description                           | Hits                                                                         | Log(q-value) |
|---------------------------------------|------------------------------------------------------------------------------|--------------|
| Myocardial Ischemia                   | APOE FABP4 GPT ID1 ID3 LGALS3 NFKBIA SLN VWF KLF4 TXNIP PPP1R15A DDIT4 SRXN1 | -5.3         |
| Comedone                              | CISH LGALS3 S100B VWF TXNIP                                                  | -3.3         |
| Stable angina                         | APOE COL3A1 FABP4 LGALS3 VWF KLF2                                            | -2.9         |
| Noninfiltrating Intraductal Carcinoma | CDKN1A CISH COL1A1 GPT LGALS3 S100B SLN VWF TXNIP                            | -2.9         |
| Hypercholesterolemia                  | APOE COL3A1 GPT ID2 LGALS3 VWF SUCLA2 KLF2 DDIT4                             | -2.9         |
| Sleep Apnea Syndromes                 | APOE COL3A1 LGALS3 PMP22 S100B VWF                                           | -2.9         |
| Ureteral obstruction                  | COL1A1 COL3A1 ID1 LGALS3 S100B KLF4 TXNIP GADD45G                            | -2.9         |
| Subarachnoid Hemorrhage               | APOE COL3A1 GPT LGALS3 S100B VWF KLF4 TXNIP DDIT4                            | -2.9         |
| Diabetes Mellitus, Experimental       | APOE CDKN1A FABP4 ID1 LGALS3 NFKBIA S100B VWF TXNIP                          | -2.8         |
| Nonalcoholic Steatohepatitis          | APOE CDKN1A COL1A1 FABP4 GPT LGALS3 KLF4 TXNIP                               | -2.4         |
| Decompensated cirrhosis of liver      | FABP4 GPT LGALS3 VWF                                                         | -2.2         |
| Intervertebral Disc Degeneration      | APOE COL1A1 COL3A1 IGFBP5 LGALS3 TXNIP DDIT4                                 | -2.1         |
| Marfan Syndrome                       | COL1A1 COL3A1 SLN VWF KLF4                                                   | -2.1         |
| Pneumonitis                           | APOE COL1A1 COL3A1 FABP4 GPT LGALS3 S100B VWF KLF4                           | -1.9         |
| Drug-Induced Liver Disease            | APOE COL3A1 FABP4 GPT LGALS3 S100B VWF SRXN1                                 | -1.9         |
| Progressive Neoplastic Disease        | APOE GPT NFKBIA PMP22 S100B VWF KLF2                                         | -1.9         |
| Progressive cGVHD                     | APOE GPT NFKBIA PMP22 S100B VWF KLF2                                         | -1.9         |
| Anaplastic thyroid carcinoma          | APOE CDKN1A COL1A1 LGALS3 KLF4 TXNIP GADD45G                                 | -1.9         |
| Complete atrioventricular block       | CISH FABP4 GPT HSF4 LGALS3 VWF NOL3                                          | -1.8         |
| Pulmonary Hypertension                | APOE CDKN1A COL1A1 ID1 VWF                                                   | -1.8         |

**S. Table 7 : Diseases associated with significantly expressed genes in Failure stage**

| Description                          | Hits                                                                                                                                                                                              | Log(q-value) |
|--------------------------------------|---------------------------------------------------------------------------------------------------------------------------------------------------------------------------------------------------|--------------|
| Cardiomyopathy , Familial Idiopathic | CAPN2 CNN1 CTH CTSB F3 FABP4 HIF1A LGALS3 MMP2 MYL3 PPP1R1A SRGN S100B CXCL12 SLC22A3 SNAI2 STAT3 THBS1 TIMP1 TIMP3 TNFRSF1B UCP2 HAND1 BAG3 MMRN1 PDLIM3 SULF2 RHOJ MYLK3 SFXN1 HSPB6 XIRP2 ABRA | -9.4         |
| Vascular Diseases                    | CAPN2 CTH EGR1 F3 FLNA HIF1A HSPA1A HSPB1 LGALS3 MMP2 SORT1 S100B CXCL12 SGK1 STAT3 TGFB2 THBS1 TIMP1 TNFRSF1B UCP2 VWF LPCAT3 KLF2 MMRN1 MYLIP PDGFC TRIM63 SYNPO2                               | -7.1         |
| Middle Cerebral Artery Occlusion     | AQP1 ATF3 CTSB CYLD EGR1 HIF1A HSPA1A HSPB1 LDHA LGALS3 LRP1 MDK MMP2 S100B CXCL12 SGK1 STAT3 TIMP1 UCP2 VWF AKAP1 ADAMTS1 KLF2 UBQLN1 STK26 SRXN1                                                | -6.8         |
| Complications of Diabetes Mellitus   | ATF3 CYLD EGR1 HIF1A HSPB1 KCNQ1 LGALS3 SMAD1 MMP2 ENPP1 PON2 CXCL12 STAT3 THBS1 TPD52 UCP2 MMRN1                                                                                                 | -6.8         |
| Aortic Aneurysm, Abdominal           | AQP1 CD44 CTSB EGR1 F3 FABP4 FBLN2 FLNA HIF1A LGALS3 LRP1 MDK MMP2 SORT1 CXCL12 STAT3 TGFB2 THBS1 TIMP1 TIMP3 UCP2 VWF ADAMTS1 MMRN1 MCAT                                                         | -6.8         |
| Left Ventricular Hypertrophy         | ACTA1 CKM CTF1 DBP NQO1 FABP4 GJA5 HIF1A LGALS3 MMP2 MYL3 ENPP1 PON2 S100B CXCL12 THBS1 TIMP1 AKAP1 ERAP1 COQ9                                                                                    | -6           |
| Cardiomyopathy , Dilated             | ACTA1 CNN1 CTSB F3 GJA5 ITGA7 LDHA LGALS3 CXCL12 STAT3 TIMP1 TIMP3 TNFRSF1B HAND1 BAG3 MMRN1 PDLIM3 UFM1 MAP3K20 HSPB6 ABRA CAVIN4                                                                | -5.8         |
| Heart Diseases                       | CTF1 NQO1 F3 GJA5 HIF1A KCNQ1 LGALS3 MMP2 MYL3 PON2 CXCL12 SRM STAT3 THBS1 TIMP1 TIMP3 VWF HAND1 ADAMTS1 MMRN1 UBQLN1 HSPB6                                                                       | -5.5         |
| Marfan Syndrome                      | CD44 CNN1 KCNQ1 LRP1 MMP2 SLN TGFB2 THBS1 TIMP3 VWF ADAMTS1 MMRN1                                                                                                                                 | -5.5         |
| Secondary malignant neoplasm of bone | ATF3 CD44 CTSB EGR1 F3 FABP4 HIF1A HSPB1 ITGAV SMAD7 MMP2 ENPP1 CXCL12 SGK1 SNAI2 STAT3 ADAMTS1 RAMP1 MMRN1 WWTR1 PDLIM3 MCAT MAP3K20 NPNT                                                        | -5.5         |
| Reperfusion Injury                   | ATF3 CD44 CTSB EGR1 HIF1A HSPA1A HSPB1 SERPINE2 S100B CXCL12 STAT3 STC1 TGFB2 THBS1 TIMP3 BAG3                                                                                                    | -4.9         |
| Lung diseases                        | CD9 CD44 CTH CTSB CYLD NQO1 EGR1 FLNA HIF1A IGFBP4 KCNQ1 LGALS3 SMAD7 MMP2 CXCL12 STAT3 STC1 TIMP1 TIMP3 AP1S2 IRX5 KLF2 MMRN1 NPNT                                                               | -4.9         |

|                           |                                                                                                                                                  |      |
|---------------------------|--------------------------------------------------------------------------------------------------------------------------------------------------|------|
| Acute Coronary Syndrome   | CKM CTSB DBP EGR1 F3 FABP4 HSPA1A IGFBP4 LGALS3 LRP1 MMP2 CXCL12 STAT3 TIMP1 UCP2 VWF KLF2 MMRN1 FRMD5                                           | -4.9 |
| Pancreatic Neoplasm       | CD44 CTSB NQO1 F3 HIF1A LDHA LGALS3 SMAD1 SMAD7 MDK MMP2 SERPINE2 S100B CXCL12 STAT3 TGFB2 THBS1 TIMP1 SORBS2 BAG3 B3GNT2 LYVE1 MMRN1 WWTR1 MCAT | -4.9 |
| Ischemia                  | CKM EGR1 HIF1A ITGAV MMP2 PON2 S100B CXCL12 STAT3 THBS1                                                                                          | -4.5 |
| Myopathy                  | ACTA1 ACTN1 CAPN2 CTSB FLNA HIF1A HSPB1 ITGA7 LDHA MMP2 RPS19 SLN STAT3 THBS1 TNFRSF1B TNNT1 WFS1 AP1S2 BAG3 TRIM63 MYO18B CAVIN4                | -4.4 |
| Acute pancreatitis        | CTH CTSB CYLD NQO1 EGR1 F3 HIF1A HSPA1A HSPB1 LGALS3 SMAD7 MDK MMP2 CXCL12 STAT3 UCP2 RAMP1 KLF2                                                 | -4.3 |
| Atherosclerotic lesion    | AQP1 CTH EGR1 FABP4 HSPB1 LGALS3 MDK MMP2 SORT1 CXCL12 TGFB2 UCP2 KLF2 MMRN1                                                                     | -4.3 |
| Hypercholesterolemia      | ATF3 CTF1 F3 ACSL4 FLNA HIF1A HSPA1A LGALS3 PON2 SORT1 CXCL12 STAT3 THBS1 TNFRSF1B VWF KLF2 MMRN1 MYLIP ENAH                                     | -4.3 |
| Transient Ischemic Attack | CTSB NQO1 F3 HIF1A HSPA1A HSPB1 MMP2 CXCL12 SGK1 STAT3 TGFB2 THBS1 TNFRSF1B UCP2 VWF ADAMTS1                                                     | -4.3 |

**S. Table 8. Potential cardiovascular disease genes expressed in the cardiac hypertrophy stage**

| <b>log2 Fold Change(Hypertrophy/Control)</b> | <b>Genes in HYPERTROPHY previously not reported in CVD</b> | <b>Description</b>                                            |
|----------------------------------------------|------------------------------------------------------------|---------------------------------------------------------------|
| 3.38                                         | OTUD1                                                      | OTU deubiquitinase 1;                                         |
| 2.28                                         | C15H11orf96                                                | chromosome 15 C1orf96 homolog                                 |
| 2.09                                         | OVAR-DRB1                                                  | DLA class II histocompatibility antigen, DR-1 beta chain-like |
| 2.09                                         | ARID5A                                                     | AT-rich interaction domain 5A                                 |
| 1.98                                         | CIART                                                      | circadian associated repressor of transcription               |
| 1.87                                         | NRARP                                                      | NOTCH regulated ankyrin repeat protein                        |
| 1.67                                         | MUSTN1                                                     | musculoskeletal, embryonic nuclear protein 1                  |
| 1.67                                         | DZANK1                                                     | double zinc ribbon and ankyrin repeat domains 1               |
| 1.66                                         | FBXL17                                                     | F-box and leucine rich repeat protein 17                      |
| 1.63                                         | NARS                                                       | Asparaginyl-tRNA synthetase 1                                 |
| 1.52                                         | OVAR                                                       | MHC class I antigen                                           |
| -1.51                                        | PKDCC                                                      | protein kinase domain containing, cytoplasmic                 |
| -1.57                                        | ARHGDIG                                                    | Rho GDP dissociation inhibitor gamma                          |
| -1.61                                        | STARD10                                                    | StAR related lipid transfer domain containing 10              |
| -1.78                                        | MAPK12                                                     | mitogen-activated protein kinase 12                           |

**S. Table 9. Potential cardiovascular disease genes expressed in the myocardium dilatation stage**

| <b>log2 Fold<br/>Change(Dilated/Control)</b> | <b>Genes in DILATED<br/>stage previously not<br/>reported in CVD</b> | <b>Description</b>                       |
|----------------------------------------------|----------------------------------------------------------------------|------------------------------------------|
| 2.05                                         | TMEM205                                                              | transmembrane protein 205                |
| 1.99                                         | ADIRF                                                                | adipogenesis regulatory factor           |
| 1.84                                         | C6H4orf48                                                            | chromosome 6 C4orf48 homolog             |
| 1.74                                         | NGRN                                                                 | neugrin, neurite outgrowth<br>associated |
| 1.71                                         | PROSER1                                                              | proline and serine rich 1                |
| 1.68                                         | ERICH2                                                               | glutamate rich 2                         |
| 1.54                                         | C15H11orf96                                                          | chromosome 15 C11orf96 homolog           |
| -1.65                                        | ARHGDIG                                                              | Rho GDP dissociation inhibitor<br>gamma  |

**S. Table 10. Potential cardiovascular disease genes expressed in the heart failure stage**

| <b>log2 Fold Change(Failure/Control)</b> | <b>Genes in FAILURE stage previously not reported in CVD</b> | <b>Description</b>                                                              |
|------------------------------------------|--------------------------------------------------------------|---------------------------------------------------------------------------------|
| 2.91                                     | ANKRD2                                                       | ankyrin repeat domain 2                                                         |
| 2.22                                     | STK38L                                                       | serine/threonine kinase 38 like                                                 |
| 1.98                                     | ACOT9                                                        | acyl-CoA thioesterase 9                                                         |
| 1.80                                     | ARID5A                                                       | AT-rich interaction domain 5A                                                   |
| 1.73                                     | FKBP10                                                       | FKBP prolyl isomerase 10                                                        |
| 1.63                                     | OLFML3                                                       | olfactomedin like 3                                                             |
| 1.57                                     | LITAF                                                        | lipopolysaccharide induced TNF factor                                           |
| 1.52                                     | SKP1-2                                                       | SKP1 S-phase kinase associated protein 1                                        |
| -1.51                                    | PIGZ                                                         | phosphatidylinositol glycan anchor biosynthesis class Z                         |
| -1.54                                    | PACRG                                                        | parkin coregulated                                                              |
| -1.62                                    | INSYN1                                                       | inhibitory synaptic factor 1                                                    |
| -1.85                                    | METTL11B                                                     | methyltransferase like 11B                                                      |
| -1.93                                    | DQA                                                          | SLA class II histocompatibility antigen, DQ haplotype D alpha chain             |
| -1.95                                    | CHST2                                                        | carbohydrate sulfotransferase 2                                                 |
| -1.95                                    | CITED1                                                       | Cbp/p300 interacting transactivator with Glu/Asp rich carboxy-terminal domain 1 |
| -2.00                                    | SBK2                                                         | SH3 domain binding kinase family member 2                                       |
| -2.91                                    | RBFOX3                                                       | RNA binding fox-1 homolog 3                                                     |
